# Supplementary material for: Diffusion–reaction competition governs zinc electrodeposition in three-dimensional carbon scaffolds
Source: Royal Society of Chemistry journal article supplement (doi:10.1039/d5ta08999a), 2026-01-01
Supplement: d5ta08999a1.pdf [file d5ta08999a1.pdf]

Supplementary information for

**Diffusion–reaction competition governs zinc electrodeposition in  
three-dimensional carbon scaffolds**

Qingyang Yin<sup>1</sup>, Faith Ann Brookshire<sup>1</sup>, Prof. Zheng Chen<sup>1,2\*</sup>

<sup>1</sup> *Aiiso Yufeng Li Family Department of Chemical and Nano Engineering, University of California, San Diego, La Jolla, CA 92093, USA*

<sup>2</sup> *Sustainable Power and Energy Center, University of California, San Diego, La Jolla, CA 92093, USA*

\* Corresponding author: zhc199@ucsd.edu

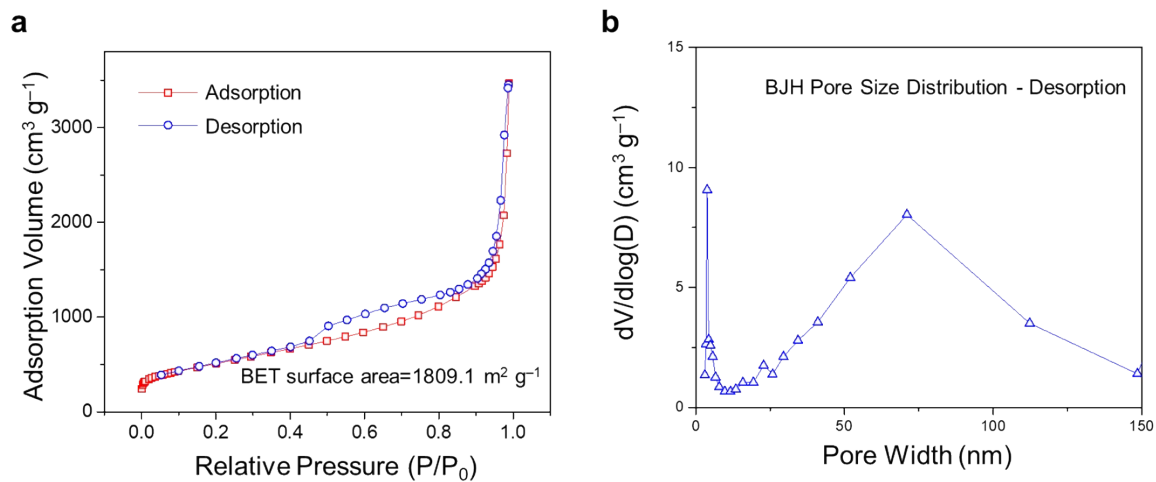

Fig. S1. (a) The BET surface area measured from  $N_2$  adsorption-desorption isotherms of Ketjen Black (KB) and (b) the corresponding BJH pore size distribution.

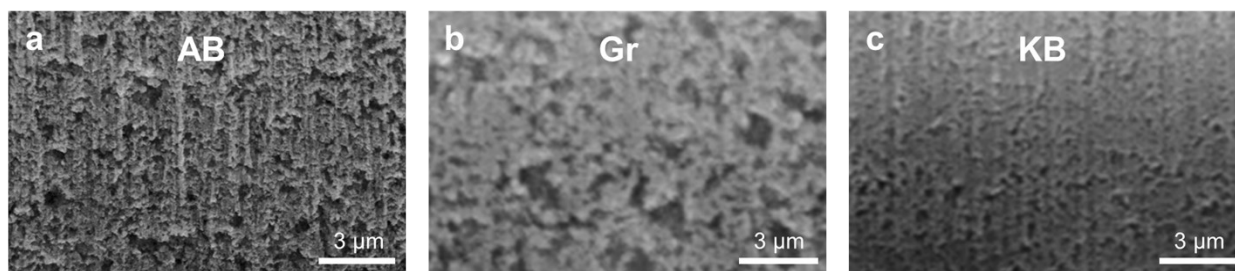

Fig. S2. Focused-ion beam scanning electron microscope (FIB–SEM) images of (a) acetylene black (AB), (b) graphene (Gr), and (c) KB-based scaffolds.

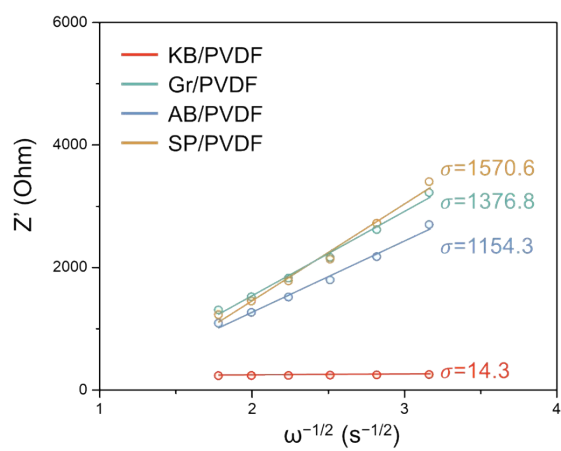

Fig. S3. Warburg coefficient ( $\sigma$ ) extracted from the low-frequency region of the Nyquist plots.

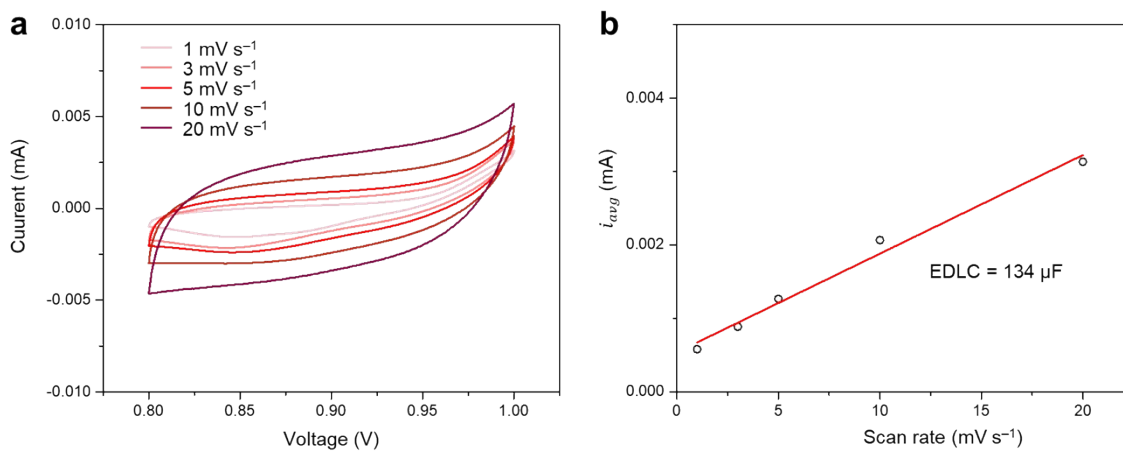

Fig. S4. (a) Cyclic voltammetry (CV) of Zn||acetylene black (AB)/PVDF at various scan rate. (b) Electrochemical double-layer capacitance (EDLC) determination of the AB/PVDF scaffold derived from the CV curves.

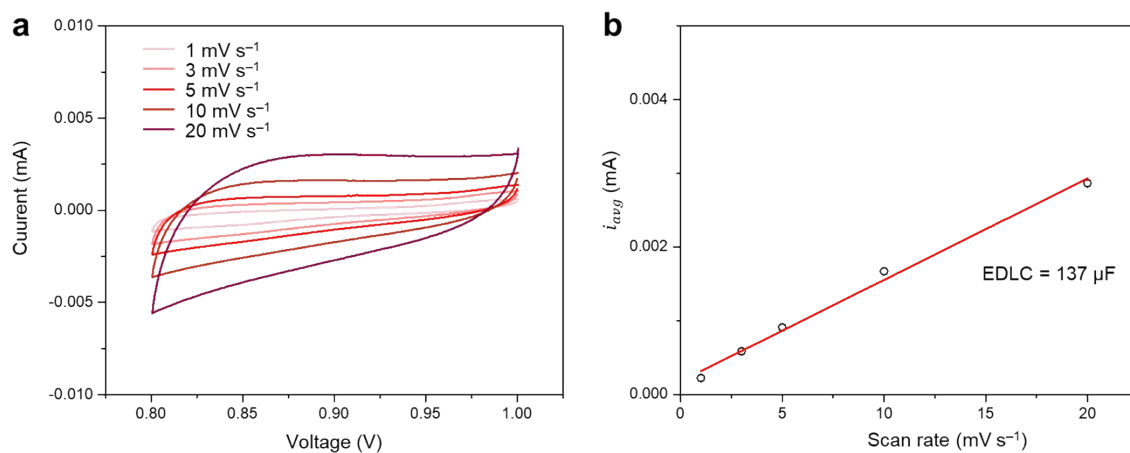

Fig. S5. (a) CV curves of Zn||Super P (SP)/PVDF at various scan rate. (b) EDLC determination of the SP/PVDF scaffold derived from the CV curves.

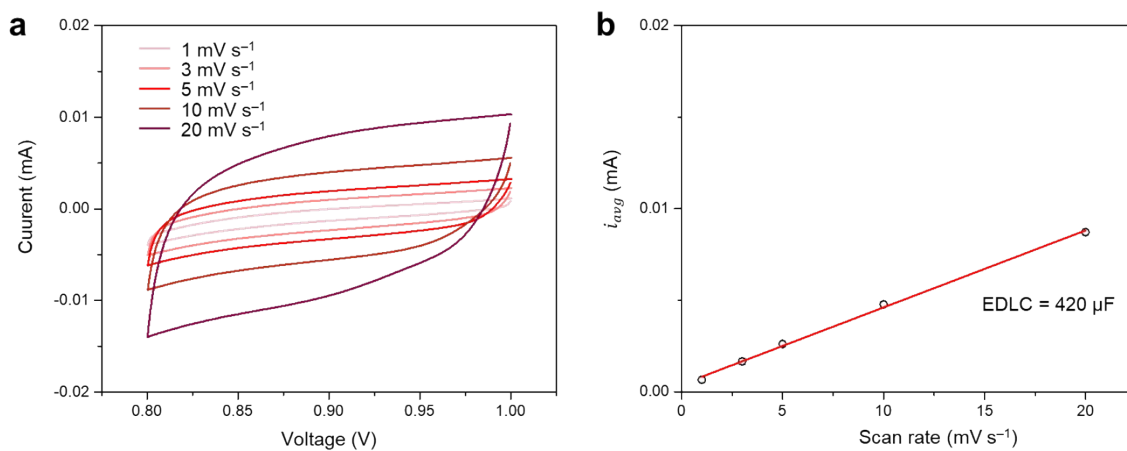

Fig. S6. (a) CV curves of Zn||graphene (Gr)/PVDF at various scan rate. (b) EDLC determination of the Gr/PVDF scaffold derived from the CV curves.

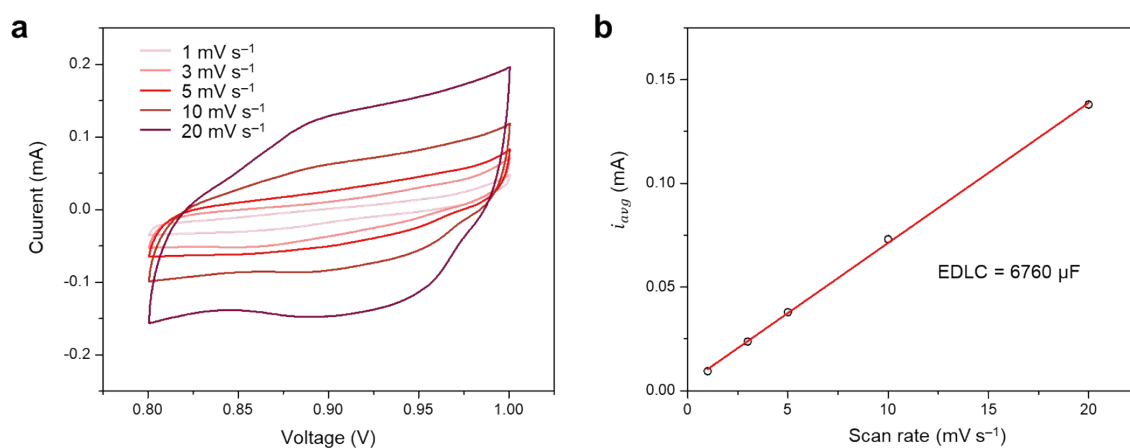

Fig. S7. (a) CV curves of Zn||Ketjen Black(KB)/PVDF at various scan rate. (b) EDLC determination of the KB/PVDF scaffold derived from the CV curves.



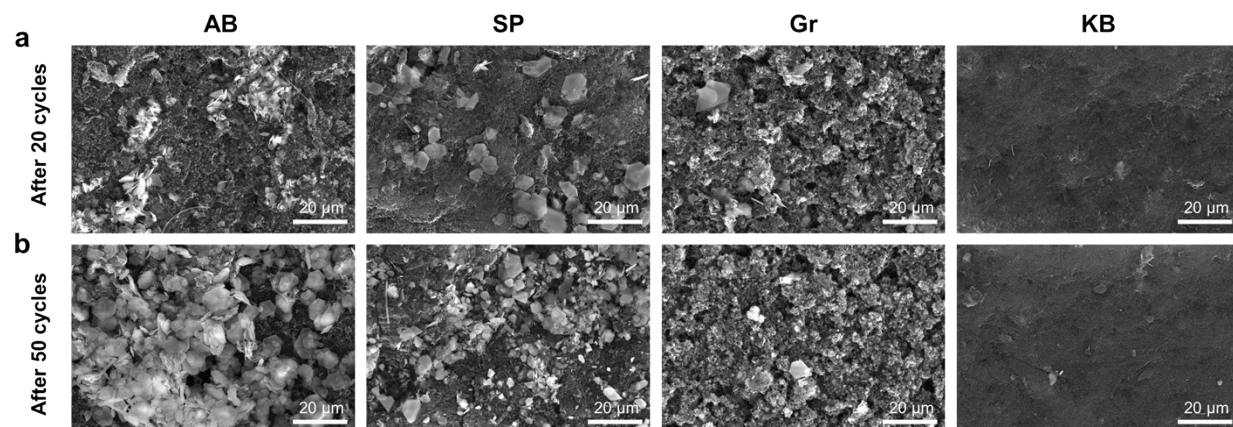

Fig. S8. SEM images of AB/PVDF, SP/PVDF, Gr/PVDF, and KB/PVDF (from left to right) after (a) 20 cycles and (b) 50 cycles of cycling at  $2 \text{ mA cm}^{-2}$ ,  $2 \text{ mAh cm}^{-2}$ .

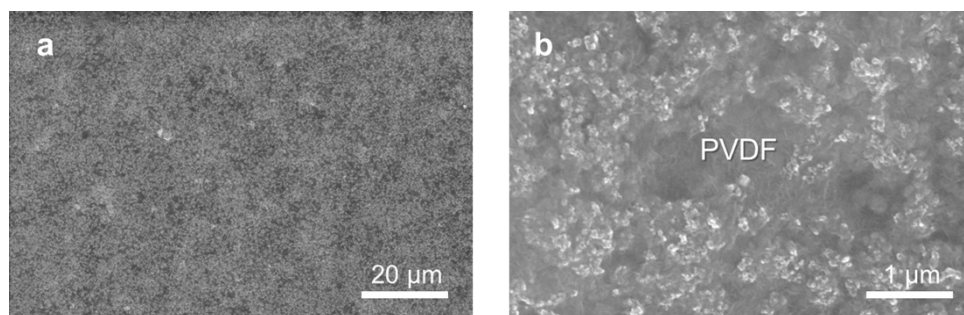

Fig. S9. SEM images of pristine KB5/PVDF5.

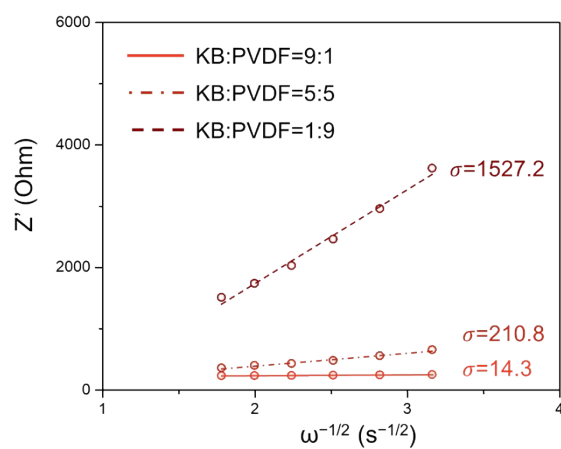

Fig. S10.  $\sigma$  of KB-based scaffolds with varying polymer fractions, extracted from the low-frequency region of the Nyquist plots.

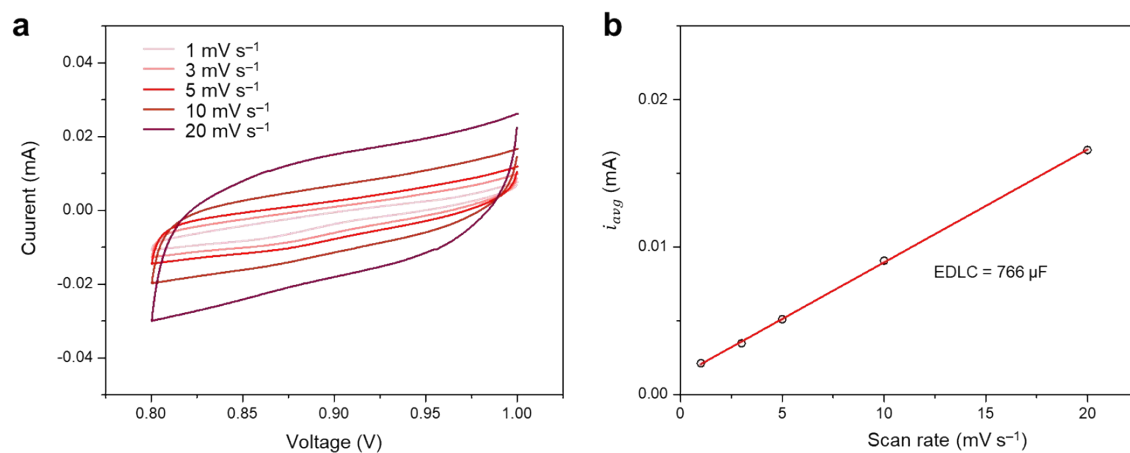

Fig. S11. (a) CV curves of Zn||KB5/PVDF5 at various scan rate. (b) EDLC determination of the KB5/PVDF5 scaffold derived from the CV curves.

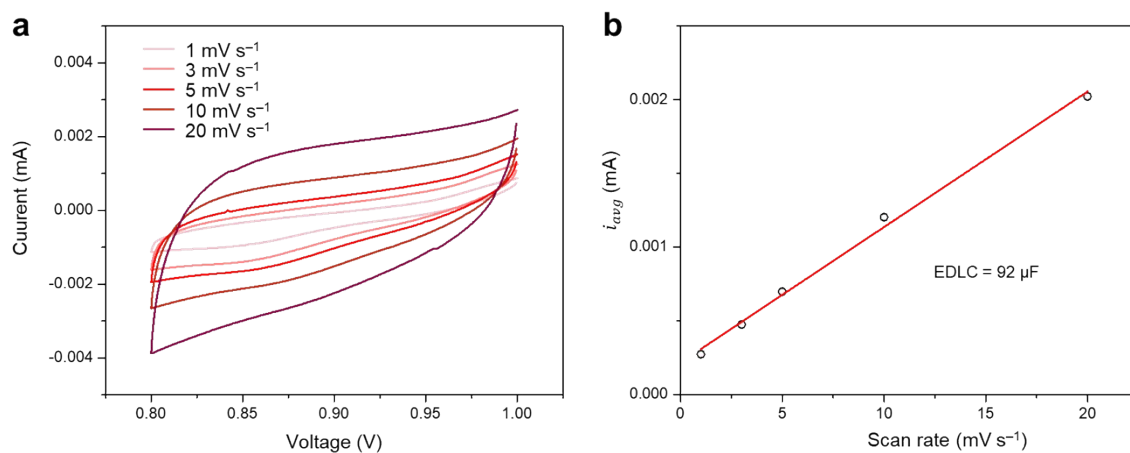

Fig. S12. (a) CV curves of Zn||KB1/PVDF9 at various scan rate. (b) EDLC determination of the KB1/PVDF9 scaffold derived from the CV curves.

**Table S1.** Warburg coefficient and apparent diffusion coefficient of scaffolds employing various carbon materials.

|         | Charge-transfer<br>resistance<br>( $\Omega$ ) | Warburg coefficient, $\sigma$<br>( $\Omega \text{ s}^{1/2}$ ) | Apparent diffusion<br>coefficient<br>( $\text{cm}^2 \text{ s}^{-1}$ ) |
|---------|-----------------------------------------------|---------------------------------------------------------------|-----------------------------------------------------------------------|
| AB/PVDF | 848.3                                         | 1154.3                                                        | $6.7 \times 10^{-16}$                                                 |
| SP/PVDF | 700.5                                         | 1570.6                                                        | $3.6 \times 10^{-16}$                                                 |
| Gr/PVDF | 694.9                                         | 1376.8                                                        | $4.7 \times 10^{-16}$                                                 |
| KB/PVDF | 222.2                                         | 14.3                                                          | $4.4 \times 10^{-12}$                                                 |

The  $\sigma$  was obtained by fitting the  $Z'$  vs.  $\omega^{-1/2}$  profile in the low-frequency region of the Nyquist plot. The apparent diffusion coefficient ( $D_{app}$ ) was calculated using equation:

$$D_{app} = \frac{R^2 T^2}{2 A^2 n^4 F^4 C^2 \sigma^2}$$

where  $R$  is the gas constant,  $T$  the absolute temperature,  $A$  the electrode area,  $n$  the valence number,  $F$  the Faraday constant, and  $C$  the bulk electrolyte concentration. Although this analysis relies on simplified assumptions, such as treating the low-frequency response as a semi-infinite diffusion regime and assuming uniform ion transport across the electrode, which cannot fully capture the complexities of porous electrodes, all four carbon-based scaffolds share comparable architectures and were tested under identical conditions. Therefore, the extracted values represent meaningful apparent diffusion coefficients for relative comparison.

**Table S2.** Warburg coefficient and apparent diffusion coefficient of KB-based scaffolds with varying polymer fractions.

|           | Charge-transfer<br>resistance, $R_{ct}$<br>( $\Omega$ ) | Warburg coefficient, $\sigma$<br>( $\Omega \text{ s}^{1/2}$ ) | Apparent diffusion<br>coefficient<br>( $\text{cm}^2 \text{ s}^{-1}$ ) |
|-----------|---------------------------------------------------------|---------------------------------------------------------------|-----------------------------------------------------------------------|
| KB/PVDF   | 222.2                                                   | 14.3                                                          | $4.4 \times 10^{-12}$                                                 |
| KB5/PVDF5 | 334.3                                                   | 210.8                                                         | $2.0 \times 10^{-14}$                                                 |
| KB1/PVDF9 | 1043.1                                                  | 1527.2                                                        | $3.8 \times 10^{-16}$                                                 |

**Table S3.** Diffusion coefficients and exchange current densities used for COMSOL simulations for each scaffold.

| Scaffold                   | Diffusion coefficients<br>( $\text{cm}^2 \text{s}^{-1}$ ) | Exchange current densities<br>( $\text{A m}^2$ ) |
|----------------------------|-----------------------------------------------------------|--------------------------------------------------|
| low $\sigma$ and high ECSA | $5 \times 10^{-12}$                                       | 5                                                |
| Medium $\sigma$ and ECSA   | $5 \times 10^{-13}$                                       | 10                                               |
| High $\sigma$ and low ECSA | $5 \times 10^{-14}$                                       | 50                                               |



**Table S4.** Summary of state-of-the-art strategies employing 3D architectures to regulate Zn deposition.

| Scaffold               | Deposition mode  | Current density & Areal capacity                   | CE performance           | Ref.             |
|------------------------|------------------|----------------------------------------------------|--------------------------|------------------|
| <b>KB@Cu</b>           | <b>Bottom-up</b> | <b>2 mA cm<sup>-2</sup>, 2 mAh cm<sup>-2</sup></b> | <b>99.5%, 700 cycles</b> | <b>This work</b> |
| CNF-Zn                 | Uniform          | 2 mA cm <sup>-2</sup> , 1 mAh cm <sup>-2</sup>     | 99.5%, 450 cycles        | [1]              |
| Sn@NHCF                | Uniform          | 5 mA cm <sup>-2</sup> , 1 mAh cm <sup>-2</sup>     | 99.5%, 600 cycles        | [2]              |
| Sn-PCF                 | Uniform          | 1 mA cm <sup>-2</sup> , 1 mAh cm <sup>-2</sup>     | 95%, 150 cycles          | [3]              |
| 3D Cu@In               | Uniform          | 0.5 mA cm <sup>-2</sup> , 0.5 mAh cm <sup>-2</sup> | 98%, 300 cycles          | [4]              |
| 3D graphene            | Uniform          | 10 mA cm <sup>-2</sup> , 1 mAh cm <sup>-2</sup>    | 98.3%, 400 cycles        | [5]              |
| R-Cu <sub>2</sub> O/CM | Uniform          | 2 mA cm <sup>-2</sup> , 1 mAh cm <sup>-2</sup>     | 99.25%, 400 cycles       | [6]              |

## Reference

- 1 J.-H. Wang, L.-F. Chen, W.-X. Dong, K. Zhang, Y.-F. Qu, J.-W. Qian and S.-H. Yu, *ACS Nano*, 2023, **17**, 19087–19097.
- 2 H. Yu, Y. Zeng, N. W. Li, D. Luan, L. Yu and X. W. (David) Lou, *Sci. Adv.*, **8**, eabm5766.
- 3 J.-L. Yang, P. Yang, W. Yan, J.-W. Zhao and H. J. Fan, *Energy Storage Mater.*, 2022, **51**, 259–265.
- 4 X.-Y. Fan, H. Yang, B. Feng, Y. Zhu, Y. Wu, R. Sun, L. Gou, J. Xie, D.-L. Li and Y.-L. Ding, *Chem. Eng. J.*, 2022, **445**, 136799.
- 5 B. Wu, B. Guo, Y. Chen, Y. Mu, H. Qu, M. Lin, J. Bai, T. Zhao and L. Zeng, *Energy Storage Mater.*, 2023, **54**, 75–84.
- 6 D. Liu, Q. Wang, W. Fang, G. Tian, X. Chen, H. Yue and S. Feng, *J. Mater. Chem. A*, 2025, **13**, 15118–15127.
